# Supplementary material for: Geographic and Clinical Variation in Clozapine Use in the United States
Source: Atypon-hosted journal article supplement (doi:10.1176/appi.ps.201300180), 2013-11-15

**ICD-9-CM Codes Used to Identified Diagnosis of Interest for Clozapine Analysis**

| <b>Diagnosed Groups</b>            | <b>ICD-9-CM Codes*</b>                                                         |
|------------------------------------|--------------------------------------------------------------------------------|
| Any Mental Disorders               | 290.xx - 319.xx                                                                |
| Schizophrenia                      | 295.xx                                                                         |
| Schizophreniform                   | 295.4x                                                                         |
| Schizoaffective Disorders          | 295.7x                                                                         |
| Epilepsy                           | 345.xx                                                                         |
| White Blood Cell Diseases          | 288.xx                                                                         |
| Moderate/Severe Mental Retardation | 318.xx                                                                         |
| Intracranial Injury                | 815.xx-854.xx                                                                  |
| Substance Use Disorders            | 291.xx, 292.xx, 303.xx, 304.xx                                                 |
| Depressive Disorders               | 293.83, 296.2x, 296.3x, 296.9x, 298.0x, 300.4x, 311.xx                         |
| Anxiety Disorders                  | 293.84, 300.0x, 300.2x, 300.3x, 308.3x, 309.21, 309.81, 313.0x, 313.2x, 313.89 |
| Deliberate Self-harm               | E950-959                                                                       |
| Diabetes                           | 250.xx                                                                         |
| Serious Cardiovascular Diseases    | 401.0x-404.9x, 410.xx-416.xx, 425.xx-437.xx, 440.xx-447.xx                     |
| Hyperlipidemia                     | 272.0x-272.4x, 272.7x, 272.9x                                                  |
| HIV                                | 042, 043, 044, 079.53, V08                                                     |
| Drug-related Dyskinesia            | 333.85                                                                         |

\* x indicates inclusion of any 5<sup>th</sup> digit if available for a diagnosis code.

xx indicates inclusion of any 4<sup>th</sup> and 5<sup>th</sup> digits if available for a diagnosis code.

**CPT Codes for Psychotherapy or Psychosocial Service Contacts**

| <b>Services</b>               | <b>CPT Codes</b>                                                   |
|-------------------------------|--------------------------------------------------------------------|
| Psychotherapy                 | 90804-90829, 90841-90847, 90849, 90853, 90855, 90857, 90875, 90876 |
| Psychosocial Service Contacts | H0036, H2000, H2010, H2011, H2012, H2014, H2017                    |

Predictors of clozapine use in the U.S.

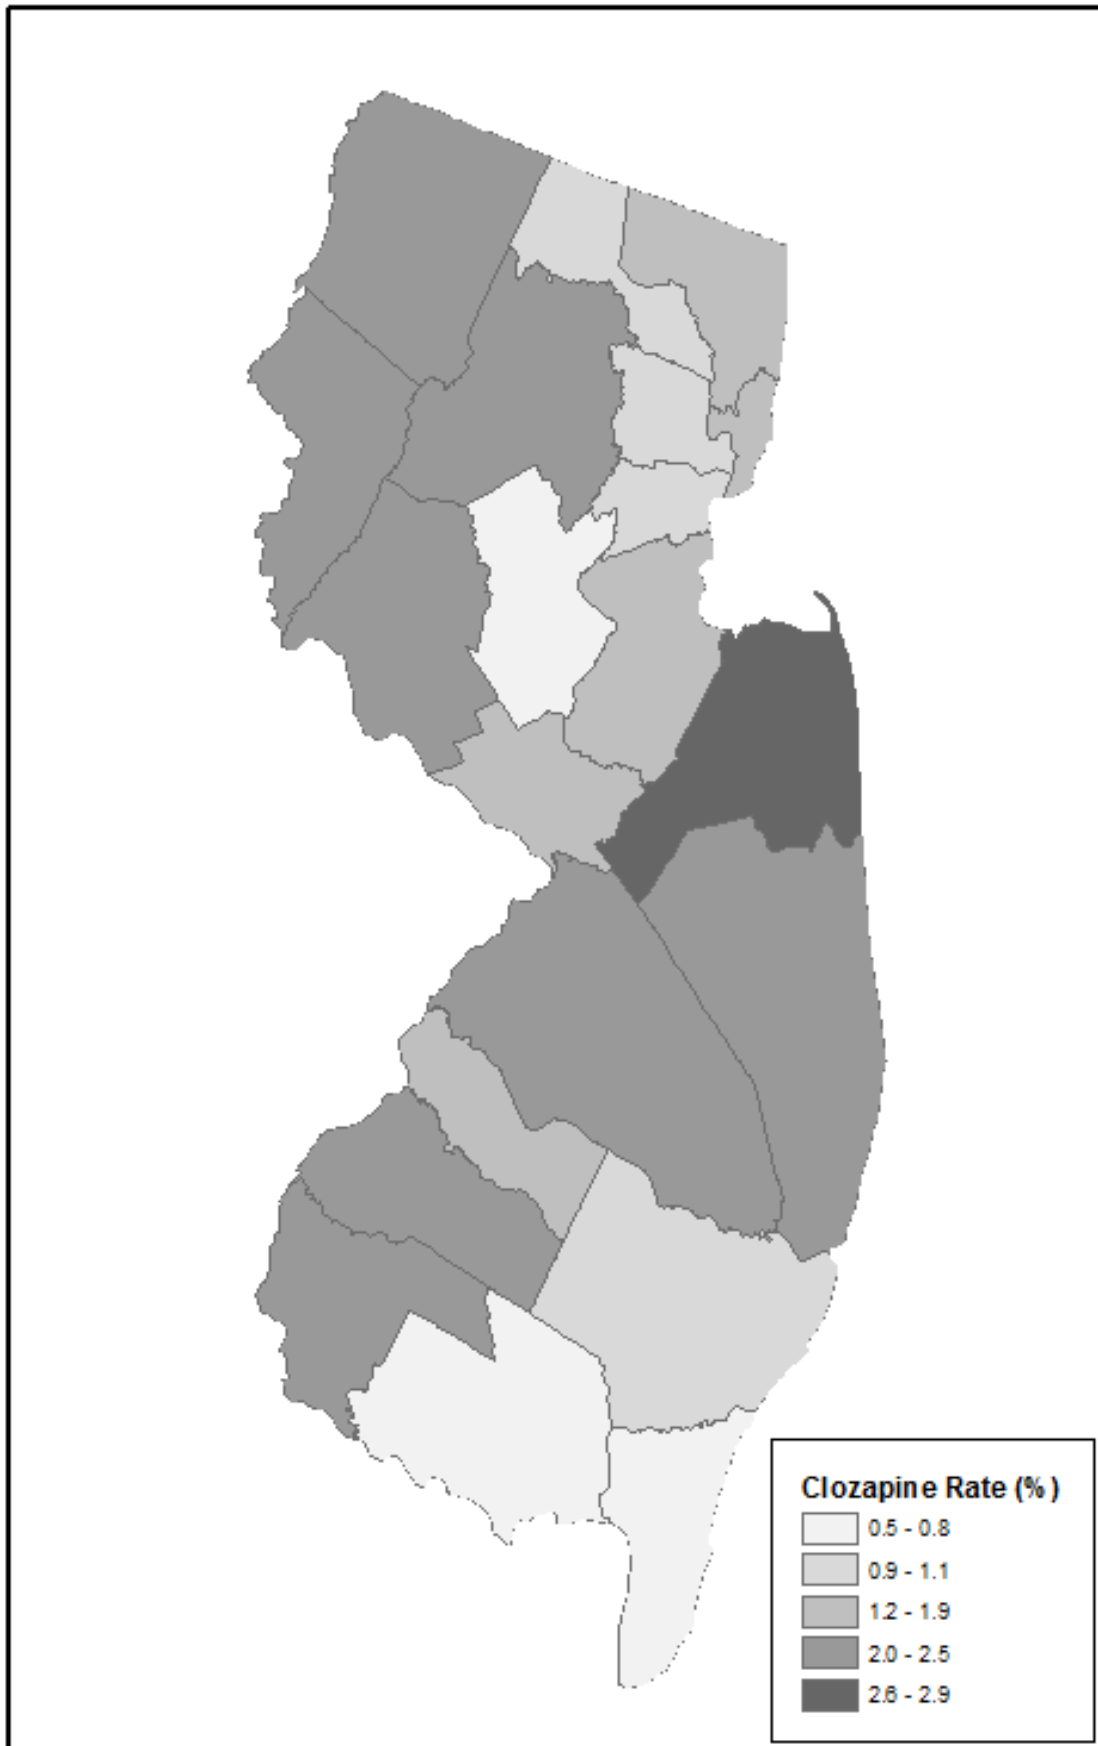

Predictors of clozapine use in the U.S.

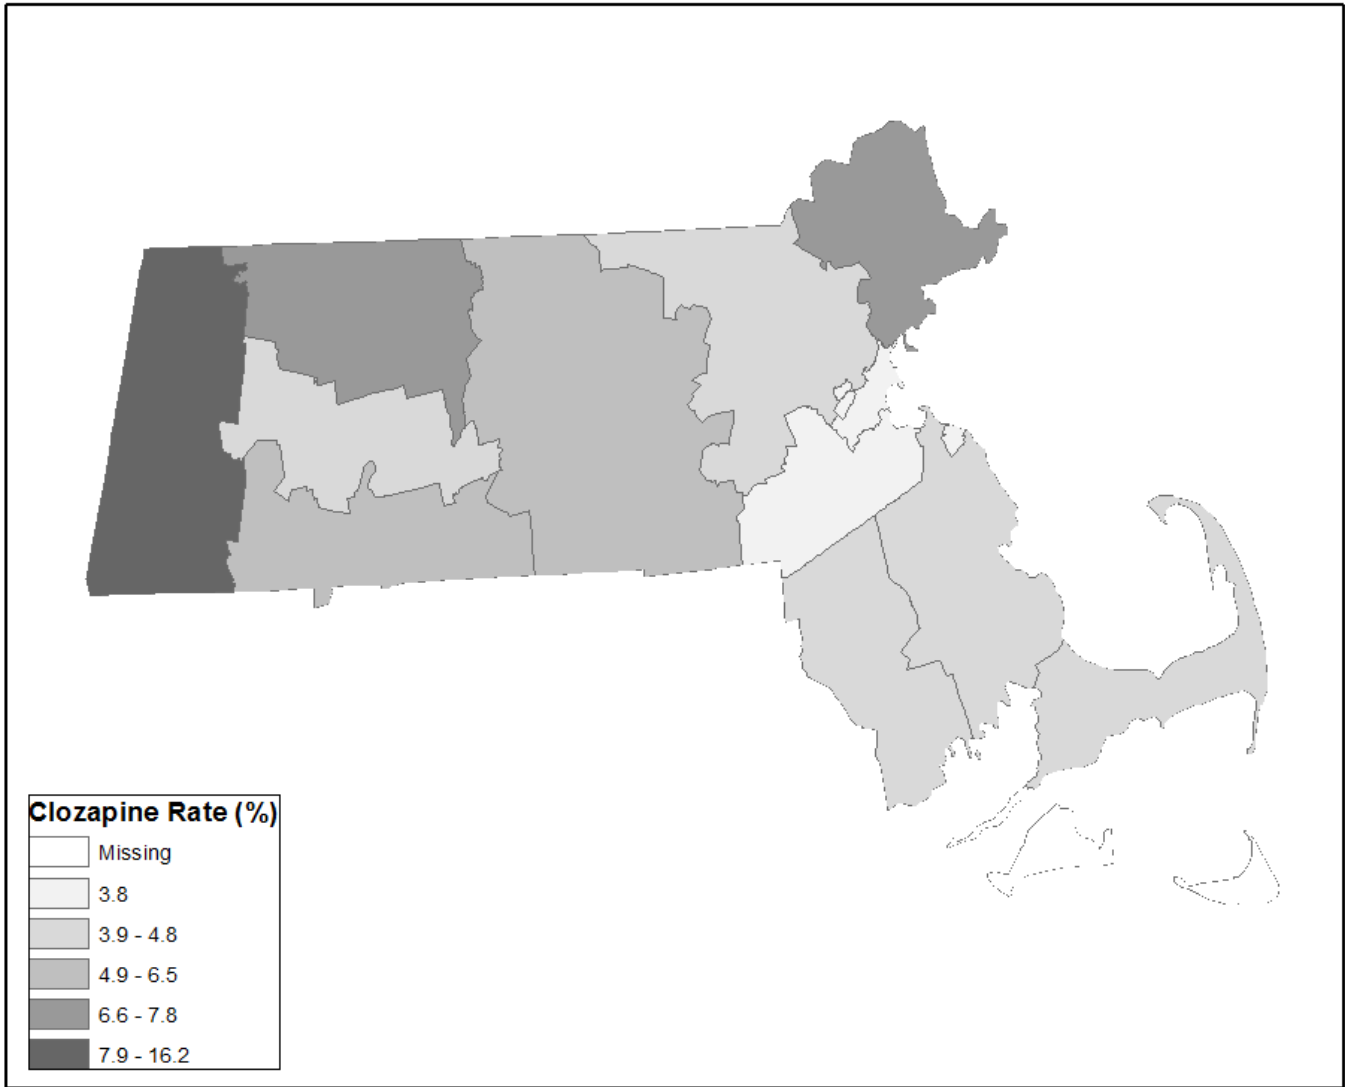

Supplement: 186_ds001.pdf [file 186_ds001.pdf]
